# Supplementary material for: Tuning the Charge Transport in Nickel Salicylaldimine Polymers by the Ligand Structure
Source: MDPI journal article supplement (doi:10.3390/molecules27248798), 2022-12-12
Supplement: s1 [file s1]

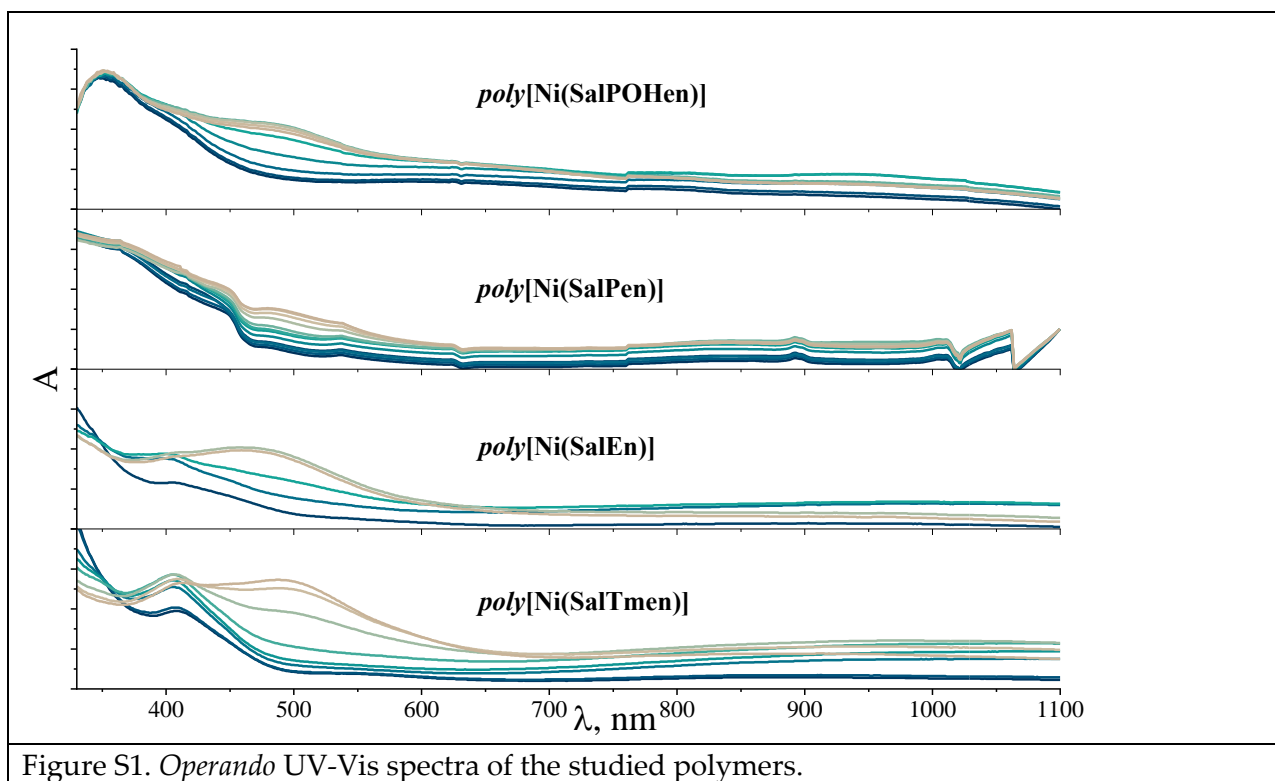

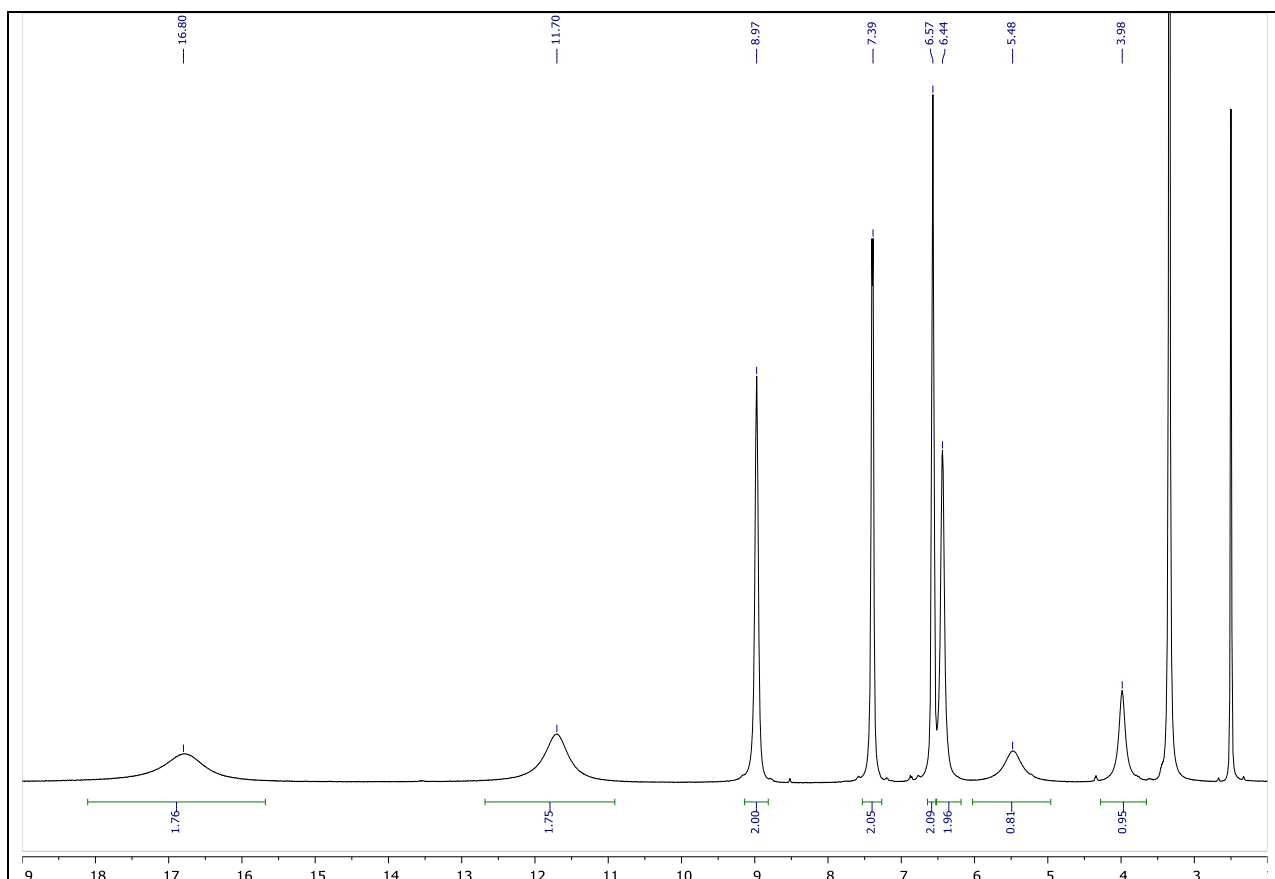

Figure S2. <sup>1</sup>H NMR spectrum of [Ni(SalPOHen)]

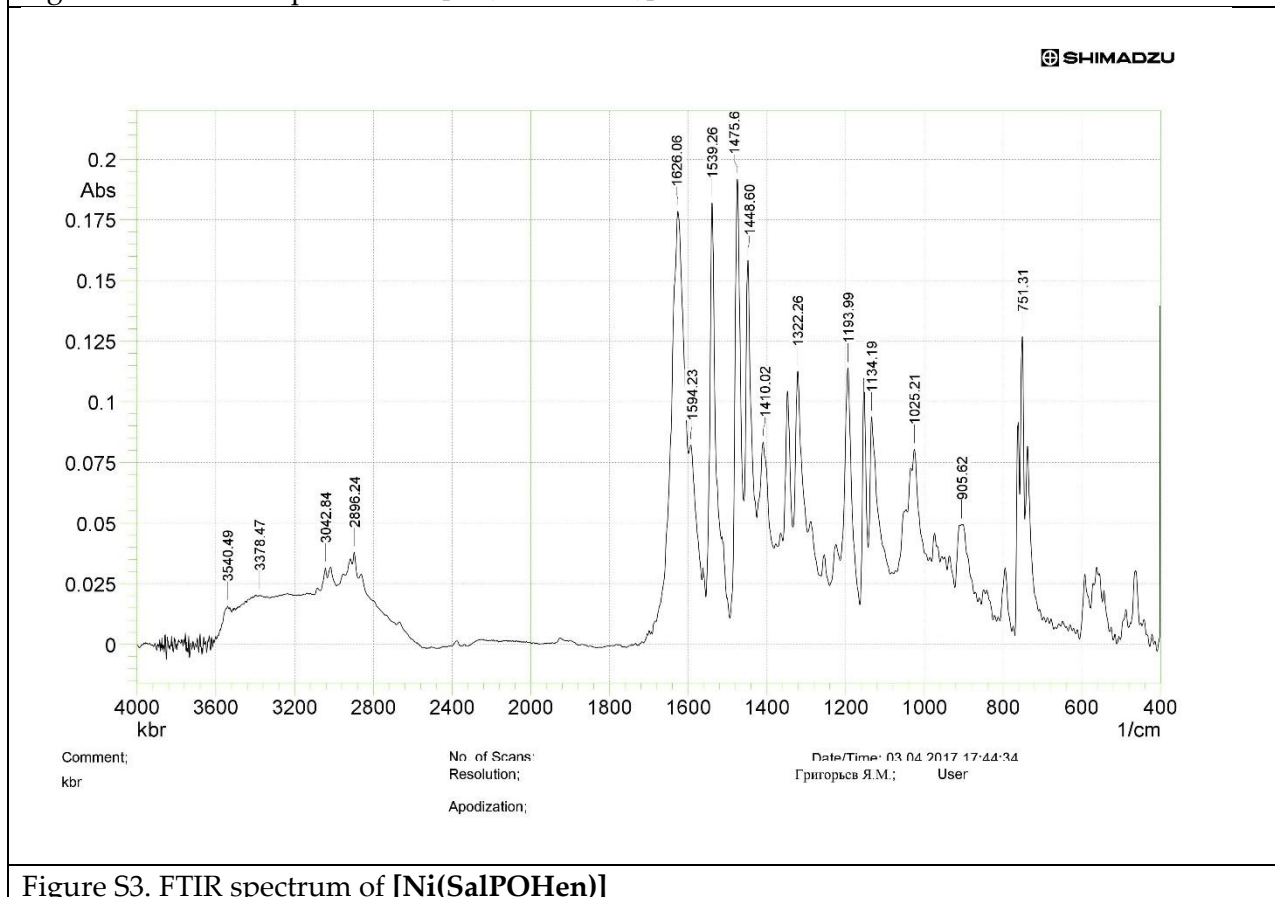

Figure S3. FTIR spectrum of [Ni(SalPOHen)]

## Display Report

### Analysis Info

Analysis Name D:\Data\Work\2017\April\11\DAL\_034\_000001.d  
Method tune\_low.m  
Sample Name DAL\_034\_  
Comment

Acquisition Date 4/11/2017 11:09:38 AM

Operator BDAL@DE  
Instrument maXis 62

### Acquisition Parameter

|             |            |                       |           |                  |           |
|-------------|------------|-----------------------|-----------|------------------|-----------|
| Source Type | ESI        | Ion Polarity          | Positive  | Set Nebulizer    | 0.3 Bar   |
| Focus       | Not active | Set Capillary         | 3200 V    | Set Dry Heater   | 190 °C    |
| Scan Begin  | 50 m/z     | Set End Plate Offset  | -500 V    | Set Dry Gas      | 4.0 l/min |
| Scan End    | 3000 m/z   | Set Collision Cell RF | 300.0 Vpp | Set Divert Valve | Source    |

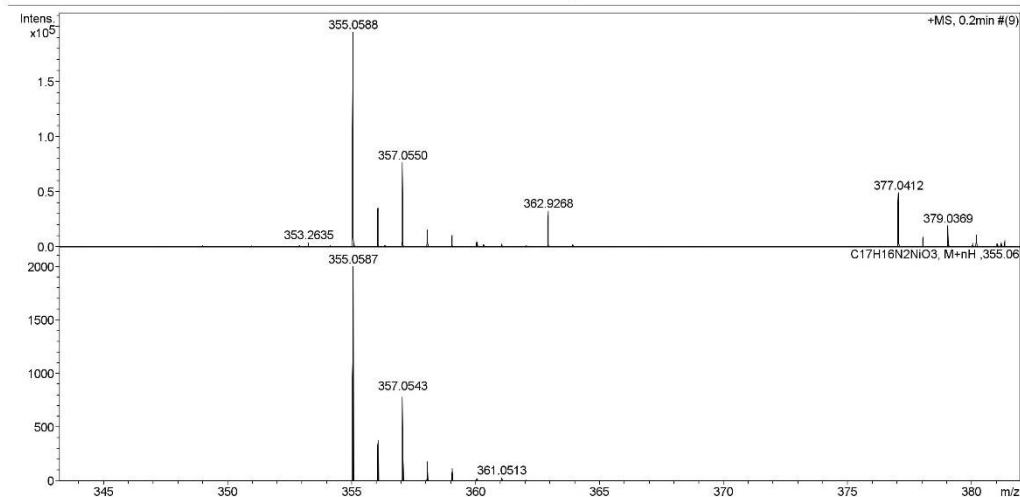

Bruker Compass DataAnalysis 4.0

printed: 4/12/2017 12:47:44 PM

Page 1 of 1

Create PDF files without this message by purchasing novaPDF printer (<http://www.novapdf.com>)

Figure S4. HRMS spectrum of [Ni(SalPOHen)]

### Crystallographic data for [Ni(SalPOHen)]

X-ray single crystal analysis were performed on Agilent Technologies «Supernova» diffractometer with monochromated Mo K $\alpha$  radiation. Crystal was measured at the temperature of 100 K. The structure has been solved by the Superflip<sup>[50–52]</sup> and ShelXS<sup>[53]</sup> structure solution programs using Charge Flipping and Direct Methods, respectively, and refined with the ShelXL<sup>[54]</sup> refinement incorporated in the OLEX<sup>2</sup> program package<sup>[55]</sup>. CCDC 1875699 contains the supplementary crystallographic data for this paper. These data can be obtained free of charge from The Cambridge Crystallographic Data Centre via <http://www.ccdc.cam.ac.uk>.

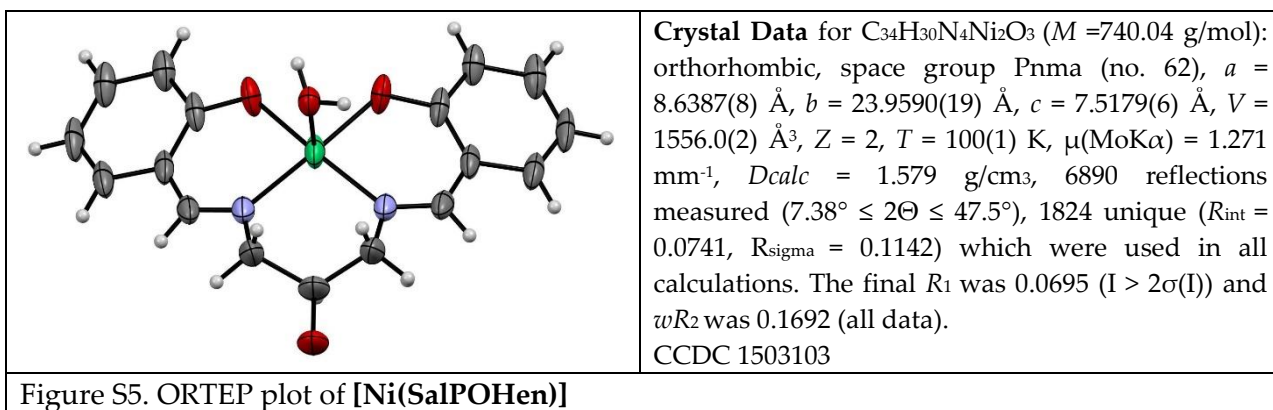

Figure S5. ORTEP plot of [Ni(SalPOHen)]
